# Supplementary material for: Compound F779-0434 causes synthetic lethality in BRCA2-deficient cancer cells by disrupting RAD52–ssDNA association
Source: Royal Society of Chemistry journal article supplement (doi:10.1039/c8ra01919c), 2018-01-01
Supplement: c8ra01919c1.pdf [file c8ra01919c1.pdf]

Table S1. Structures of top 30 chemicals in docking analysis.

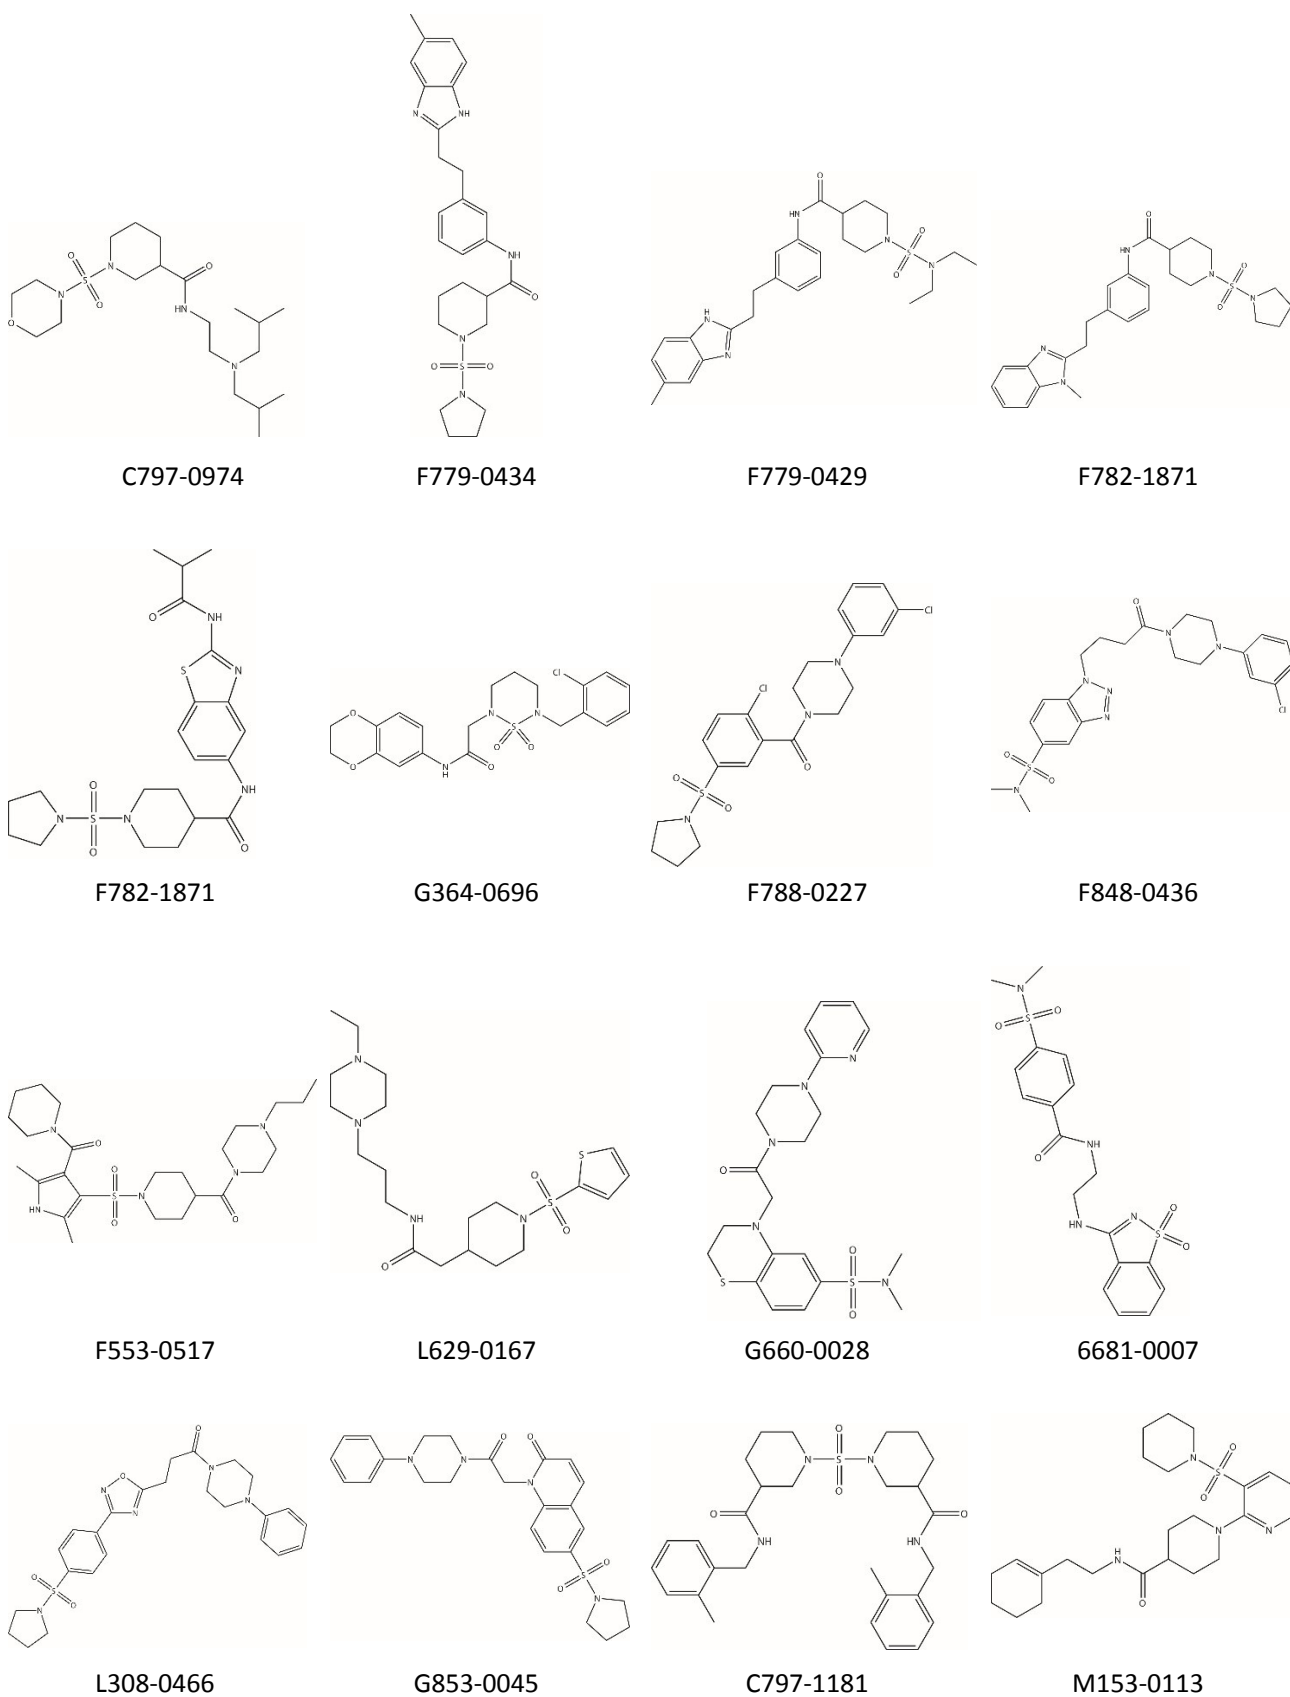

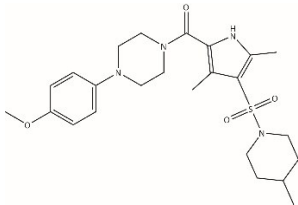

F379-0958

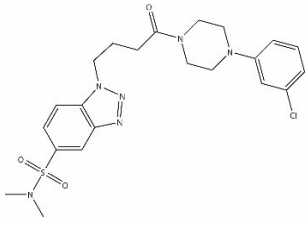

F848-0394

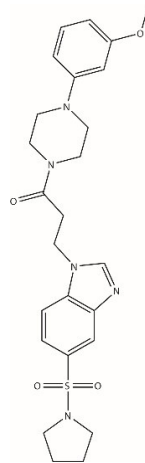

F513-0046

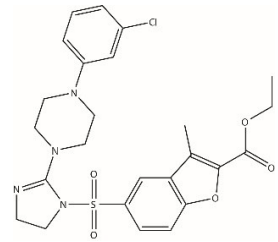

C066-5575

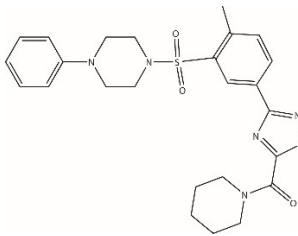

L286-0466

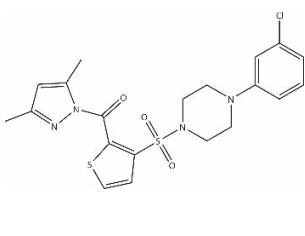

C200-9226

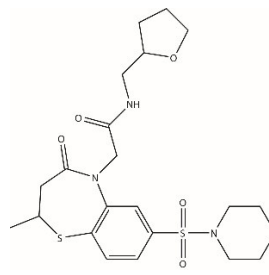

G640-1014

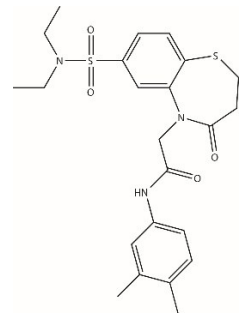

G640-0011

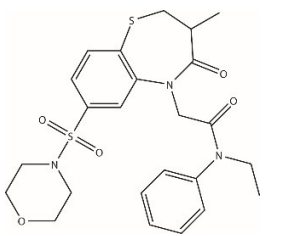

G640-0825

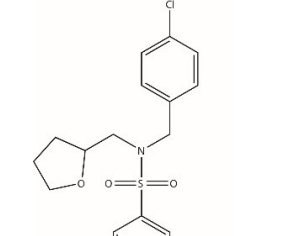

D207-0130

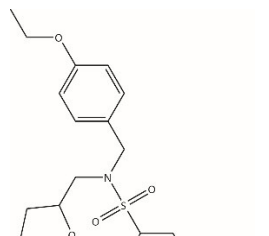

D207-0125

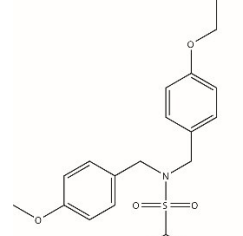

D207-0136

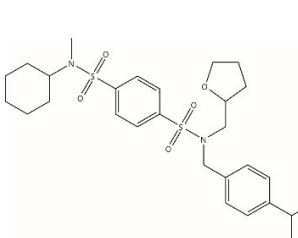

D207-0090

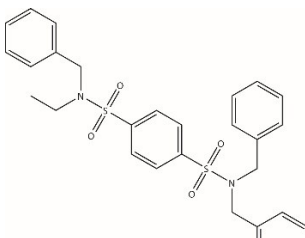

D207-0052

Table S2. ADMET properties of top 30 chemicals in docking analysis.

| Class | Name      | Docking Score | Molecular weight | Water Solubility   | Consensus Log Po/w | TPSA                  | Log Kp (skin permeation) | Bioavailability Score | Synthetic accessibility |
|-------|-----------|---------------|------------------|--------------------|--------------------|-----------------------|--------------------------|-----------------------|-------------------------|
| 1     | C797-0974 | -73.04        | 432.62           | Soluble            | 1.7                | 90.57 Å <sup>2</sup>  | -7.86 cm/s               | 0.55                  | 4.51                    |
|       | F779-0434 | -65.4151      | 495.64           | Moderately soluble | 3.07               | 106.78 Å <sup>2</sup> | -6.90 cm/s               | 0.55                  | 4.13                    |
|       | F779-0429 | -63.9194      | 497.65           | Moderately soluble | 3.57               | 106.78 Å <sup>2</sup> | -6.73 cm/s               | 0.55                  | 3.69                    |
|       | F779-1131 | -59.0317      | 495.64           | Moderately soluble | 3.07               | 95.92 Å <sup>2</sup>  | -7.19 cm/s               | 0.55                  | 3.63                    |
|       | F782-1871 | -54.7081      | 479.62           | Soluble            | 2.31               | 148.33 Å <sup>2</sup> | -7.63 cm/s               | 0.55                  | 3.74                    |
|       | G364-0696 | -59.0589      | 451.92           | Soluble            | 2.31               | 96.56 Å <sup>2</sup>  | -7.42 cm/s               | 0.55                  | 3.39                    |
| 2     | F788-0227 | -59.612       | 468.4            | Moderately soluble | 3.37               | 69.31 Å <sup>2</sup>  | -6.41 cm/s               | 0.55                  | 3.03                    |
|       | F848-0436 | -59.2082      | 474.55           | Soluble            | 2.08               | 100.02 Å <sup>2</sup> | -8.00 cm/s               | 0.55                  | 3.48                    |
|       | F533-0517 | -58.6479      | 507.69           | Moderately soluble | 2.06               | 105.41 Å <sup>2</sup> | -8.25 cm/s               | 0.55                  | 4.75                    |
|       | L629-0167 | -57.8019      | 442.64           | Soluble            | 2.03               | 109.58 Å <sup>2</sup> | -7.83 cm/s               | 0.55                  | 4.25                    |
|       | G660-0028 | -57.7897      | 461.6            | Soluble            | 1.59               | 110.74 Å <sup>2</sup> | -7.80 cm/s               | 0.55                  | 3.85                    |
|       | 6681-0007 | -56.7435      | 436.51           | Soluble            | 1.25               | 141.77 Å <sup>2</sup> | -8.54 cm/s               | 0.55                  | 3.72                    |
|       | L308-0466 | -56.3962      | 495.59           | Moderately soluble | 2.59               | 108.23 Å <sup>2</sup> | -7.36 cm/s               | 0.55                  | 3.88                    |
|       | G853-0045 | -55.8869      | 480.58           | Moderately soluble | 2.21               | 91.31 Å <sup>2</sup>  | -7.62 cm/s               | 0.55                  | 3.49                    |
|       | C797-1181 | -55.8409      | 526.69           | Moderately soluble | 2.87               | 107.20 Å <sup>2</sup> | -7.61 cm/s               | 0.55                  | 4.45                    |
|       | M153-0113 | -55.7228      | 460.63           | Moderately soluble | 3.06               | 90.99 Å <sup>2</sup>  | -6.89 cm/s               | 0.55                  | 4.65                    |
|       | F379-0958 | -54.4232      | 474.62           | Moderately soluble | 2.77               | 94.33 Å <sup>2</sup>  | -6.88 cm/s               | 0.55                  | 4.17                    |
| 3     | F848-0394 | -53.9121      | 491.01           | Moderately soluble | 2.29               | 100.02 Å <sup>2</sup> | -7.73 cm/s               | 0.55                  | 3.5                     |
|       | F513-0046 | -53.7898      | 497.61           | Soluble            | 2.1                | 96.36 Å <sup>2</sup>  | -7.92 cm/s               | 0.55                  | 3.58                    |
|       | C066-5575 | -57.764       | 531.02           | Moderately soluble | 3.48               | 104.04 Å <sup>2</sup> | -6.64 cm/s               | 0.55                  | 4.3                     |
|       | L286-0466 | -56.6176      | 495.59           | Moderately soluble | 2.95               | 108.23 Å <sup>2</sup> | -6.80 cm/s               | 0.55                  | 3.96                    |
|       | C200-9226 | -54.3811      | 464.99           | Moderately soluble | 3.42               | 112.13 Å <sup>2</sup> | -6.32 cm/s               | 0.55                  | 3.68                    |
| 4     | G640-1014 | -58.6075      | 481.63           | Soluble            | 2.15               | 129.70 Å <sup>2</sup> | -8.05 cm/s               | 0.55                  | 4.78                    |
|       | G640-0011 | -56.5278      | 475.62           | Moderately soluble | 3.12               | 120.47 Å <sup>2</sup> | -7.06 cm/s               | 0.55                  | 3.99                    |
|       | G640-0825 | -54.6971      | 503.63           | Moderately soluble | 2.55               | 120.91 Å <sup>2</sup> | -7.74 cm/s               | 0.55                  | 4.64                    |
| 5     | D207-0130 | -62.968       | 513.07           | Moderately soluble | 3.45               | 100.75 Å <sup>2</sup> | -6.88 cm/s               | 0.55                  | 4.02                    |
|       | D207-0125 | -62.0309      | 522.68           | Moderately soluble | 3.24               | 109.98 Å <sup>2</sup> | -7.15 cm/s               | 0.55                  | 4.23                    |
|       | D207-0052 | -58.5663      | 535.68           | Moderately soluble | 3.82               | 104.41 Å <sup>2</sup> | -6.71 cm/s               | 0.55                  | 3.62                    |
|       | D207-0090 | -55.8444      | 548.76           | Poorly soluble     | 4.5                | 100.75 Å <sup>2</sup> | -6.05 cm/s               | 0.55                  | 4.57                    |
|       | D207-0136 | -54.6747      | 558.71           | Moderately soluble | 4.11               | 109.98 Å <sup>2</sup> | -6.61 cm/s               | 0.55                  | 3.64                    |
